# Supplementary material for: Fabrication of nitrogen-doped ZnO nanorod arrays by hydrothermal synthesis and ambient annealing
Source: Royal Society of Chemistry journal article supplement (doi:10.1039/c8ra04168g), 2018-01-01
Supplement: c8ra04168g1.pdf [file c8ra04168g1.pdf]

Electronic Supplementary Information

**Fabrication of Nitrogen-Doped ZnO Nanorod Arrays by  
Hydrothermal Synthesis and Ambient Annealing**

Ryosuke Kobayashi,<sup>a</sup> Tetsuo Kishi,<sup>a</sup> Yuta Katayanagi,<sup>b</sup> Tetsuji Yano<sup>a</sup> and Nobuhiro Matsushita<sup>a\*</sup>

<sup>a</sup> Department of Materials Science and Engineering, School of Materials and Chemical Technology, Tokyo Institute of Technology,  
2-12-1 Ookayama, Meguro-ku, Tokyo 152-8550, Japan

<sup>b</sup> Department of Technology Education, Faculty of Education, Gunma University,  
4-2 Aramaki-machi, Maebashi, Gunma 371-8510, Japan

\*Corresponding Author

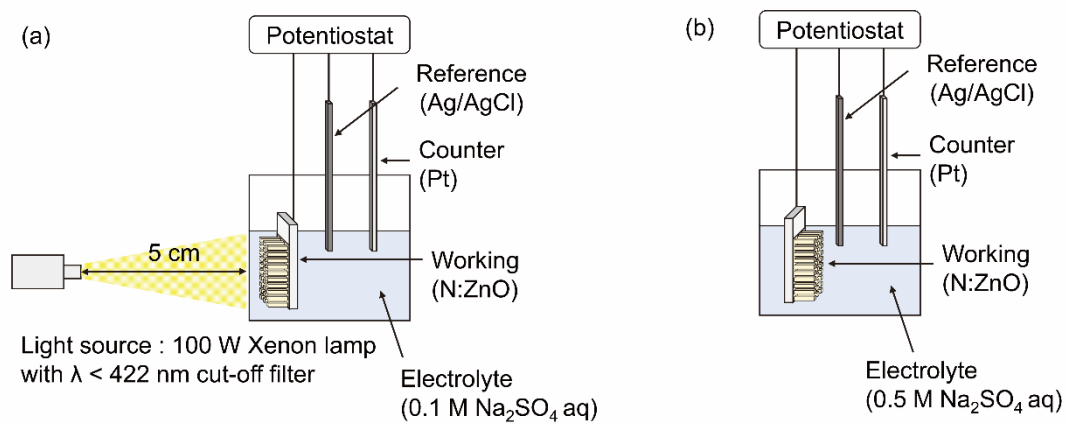

**Figure S1** The schematic figures of experimental setups for (a) photocurrent measurements and for (b) electrochemical impedance measurements.

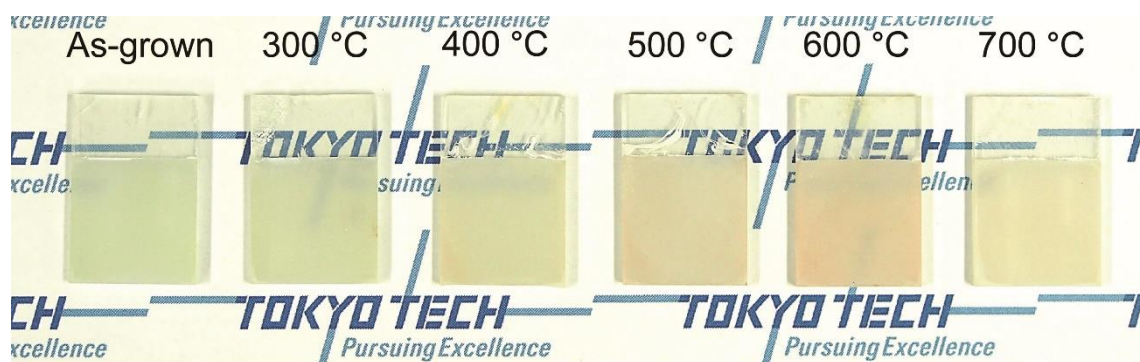

**Figure S2** Photographs of N:ZnO NRAs (as-grown, annealed at 300 °C, 400 °C, 500 °C, 600 °C, and 700 °C from left to right).
